# Supplementary material
Source: PubMed Central journal article supplement (PMC6773527)

# **Plasma biomarkers in predicting renal recovery from acute kidney injury in critically ill patients**

Marco Fiorentino<sup>1,2</sup>, Fadi A. Tohme<sup>1</sup>, Raghavan Murugan<sup>1,4</sup>, John A. Kellum<sup>1,4</sup>

1 **Supplementary Table 1.** Area under the receiver-operating characteristics curve for  
 2 biomarker models alone and for the combination of the best clinical model and  
 3 biomarker models for each time point for predicting renal recovery, excluding patients  
 4 who died but were dialysis independent from the non-recovery group.

5

| <b>Time point</b>              | <b>Model</b>       | <b>AUC</b> | <b>95%CI</b> | <b>p-value</b> |
|--------------------------------|--------------------|------------|--------------|----------------|
| <b>Day 2</b>                   | pNGAL              | 0.58       | 0.41 - 0.75  |                |
|                                | pBNP               | 0.49       | 0.32 - 0.66  |                |
|                                | pNGAL + pBNP       | 0.58       | 0.41 - 0.75  |                |
|                                | Age + pNGAL        | 0.77       | 0.64 – 0.90  | 0.31           |
|                                | Age + pBNP         | 0.74       | 0.60 – 0.88  | 0.66           |
|                                | Age + pNGAL + pBNP | 0.77       | 0.63 – 0.9   | 0.39           |
| <b>Day 14</b>                  | pNGAL              | 0.52       | 0.30 - 0.74  |                |
|                                | pBNP               | 0.57       | 0.36 - 0.79  |                |
|                                | pNGAL + pBNP       | 0.54       | 0.33 - 0.75  |                |
|                                | Age + pNGAL        | 0.75       | 0.58 – 0.93  | 1              |
|                                | Age + pBNP         | 0.76       | 0.59 – 0.93  | 0.81           |
|                                | Age + pNGAL + pBNP | 0.76       | 0.59 – 0.93  | 0.67           |
| <b>Largest relative change</b> | pNGAL              | 0.58       | 0.43 - 0.75  |                |
|                                | pBNP               | 0.64       | 0.48 - 0.80  |                |
|                                | pNGAL + pBNP       | 0.65       | 0.49 – 0.80  |                |
|                                | Age + pNGAL        | 0.74       | 0.60 – 0.88  | 0.79           |
|                                | Age + pBNP         | 0.78       | 0.65 – 0.92  | 0.26           |
|                                | Age + pNGAL + pBNP | 0.78       | 0.66 – 0.91  | 0.30           |

6

7 AUC, area under the curve; CI confidence interval; pNGAL plasma neutrophil gelatinase-associated  
 8 lipocalin; pBNP, plasma B-type natriuretic peptide.

9 # Largest relative change in the first 14 days as compared to day 2

10

**Supplementary Table 2.** Area under the receiver-operating characteristics curve for biomarker models alone and for the combination of the best clinical model and biomarker models for each time point for predicting renal recovery, considering those patients who died but were dialysis independent in the recovery group.

| <b>Time point</b>              | <b>Model</b>       | <b>AUC</b> | <b>95%CI</b> | <b>p-value*</b> |
|--------------------------------|--------------------|------------|--------------|-----------------|
| <b>Day 2</b>                   | pNGAL              | 0.57       | 0.42 - 0.72  |                 |
|                                | pBNP               | 0.48       | 0.33 - 0.64  |                 |
|                                | pNGAL + pBNP       | 0.58       | 0.43 - 0.73  |                 |
|                                | Age + pNGAL        | 0.72       | 0.59 – 0.82  | 0.42            |
|                                | Age + pBNP         | 0.69       | 0.56 - 0.82  | 0.95            |
|                                | Age + pNGAL + pBNP | 0.72       | 0.60 – 0.85  | 0.41            |
| <b>Day 14</b>                  | pNGAL              | 0.50       | 0.31 - 0.70  |                 |
|                                | pBNP               | 0.51       | 0.32 - 0.71  |                 |
|                                | pNGAL + pBNP       | 0.53       | 0.35 - 0.72  |                 |
|                                | Age + pNGAL        | 0.68       | 0.52 – 0.84  | 0.76            |
|                                | Age + pBNP         | 0.69       | 0.52 – 0.85  | 0.91            |
|                                | Age + pNGAL + pBNP | 0.69       | 0.52 – 0.85  | 0.94            |
| <b>Largest relative change</b> | pNGAL              | 0.54       | 0.40 - 0.69  |                 |
|                                | pBNP               | 0.61       | 0.47 - 0.76  |                 |
|                                | pNGAL + pBNP       | 0.62       | 0.48 – 0.76  |                 |
|                                | Age + pNGAL        | 0.70       | 0.52 – 0.85  | 0.69            |
|                                | Age + pBNP         | 0.72       | 0.57 – 0.83  | 0.47            |
|                                | Age + pNGAL + pBNP | 0.72       | 0.59 – 0.85  | 0.48            |

AUC, area under the curve; CI confidence interval; pNGAL plasma neutrophil gelatinase-associated lipocalin; pBNP, plasma B-type natriuretic peptide.

\*P-values refer to comparisons of each model with the AUC of age alone.

# Largest relative change in the first 14 days as compared to day 2

**Supplementary Figure 1. Box plots for pNGAL (1a) and pBNP (1b) between recovery vs non-recovery group**

The vertical box represents the 25<sup>th</sup> percentile (bottom line), median (middle line), and 75<sup>th</sup> percentile (top line) values, while the vertical bars indicate maximum and minimum values. pNGAL plasma neutrophil gelatinase associated lipocalin; pBNP plasma B-type natriuretic peptide.

**Supplementary Figure 2. Box plots for pNGAL between patients in the non-recovery group**

The vertical box represents the 25<sup>th</sup> percentile (bottom line), median (middle line), and 75<sup>th</sup> percentile (top line) values, while the vertical bars indicate maximum and minimum values. pNGAL plasma neutrophil gelatinase associated lipocalin.

Suppl. Fig 1a

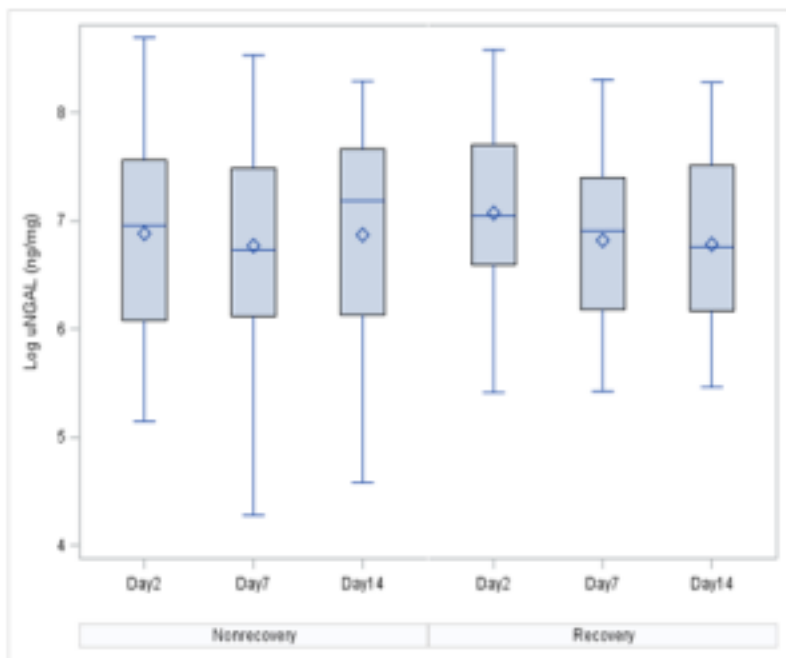

Suppl. Fig 1b

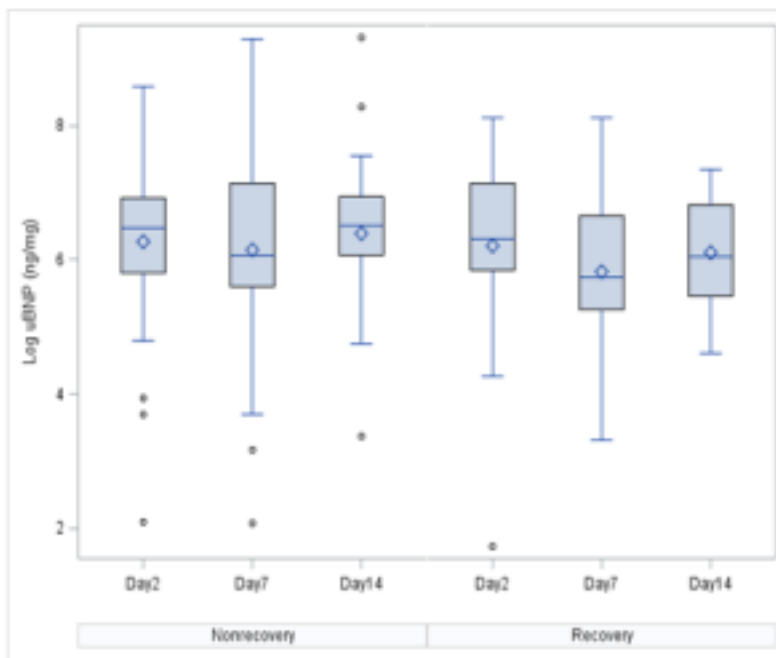

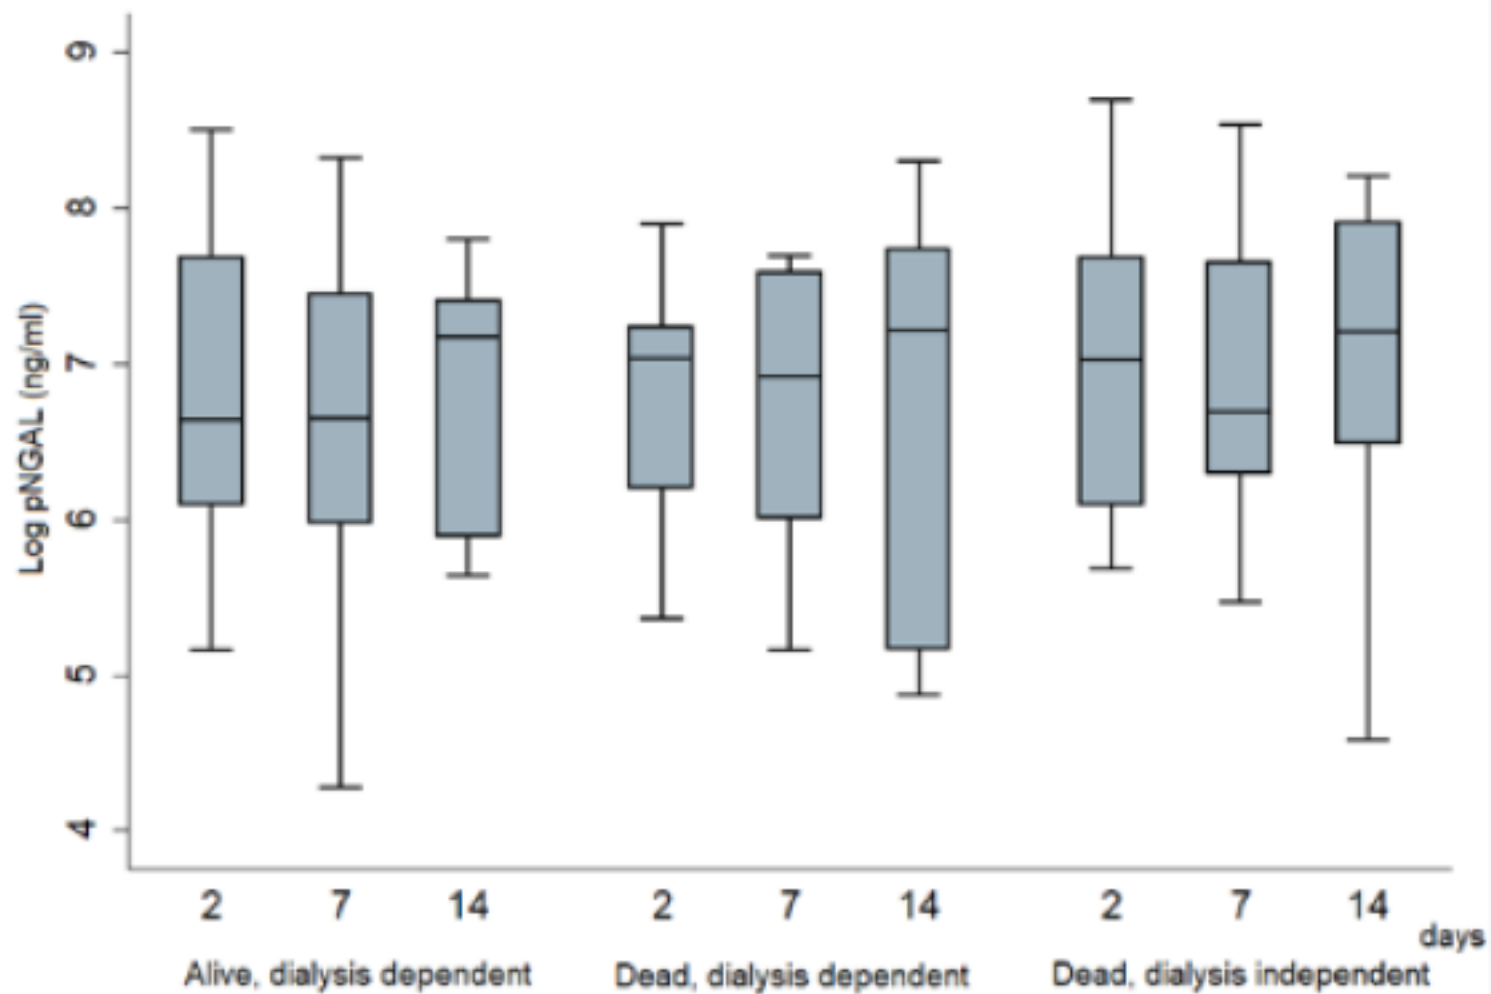

Supplement: NIHMS1027439-supplement-1.pdf [file NIHMS1027439-supplement-1.pdf]
